# Supplementary material for: Downstream Mammary and Extramammary Cascade Services and Spending Following Screening Breast Magnetic Resonance Imaging vs Mammography Among Commercially Insured Women
Source: PubMed Central journal article supplement (PMC9008498; doi:10.1001/jamanetworkopen.2022.7234), 2022-04-13
Supplement: jamanetwopen-e227234-s001.pdf [file jamanetwopen-e227234-s001.pdf]

## Supplemental Online Content

Ganguli I, Keating NL, Thakore N, Lii J, Raza S, Pace LE. Downstream mammary and extramammary cascade services and spending following screening breast magnetic resonance imaging vs mammography among commercially insured women. *JAMA Network Open*. 2022;5(4):e227234. doi:10.1001/jamanetworkopen.2022.7234

**eAppendix.** Relevant Choosing Wisely Recommendation

**eTable 1.** Diagnosis and Procedure Codes Used in MRI and Mammography Cohort Selection

**eTable 2.** Diagnosis and Procedure Codes for Propensity to Receive Breast MRI

**eTable 3.** Procedure Codes for Cascade Laboratory Tests

**eTable 4.** Procedure Codes for Cascade Imaging Tests

**eTable 5.** Procedure Codes for Cascade Procedures

**eTable 6.** Procedure Codes for Cascade Visits and Specialty Codes for Cascade Specialty Visits

**eTable 7.** Diagnosis Codes for Cascade New Diagnoses

**eTable 8.** Cascade Event Rates and Total and Out-of-Pocket Spending on Mammary Cascade Services among Screening Breast MRI vs Mammography Recipients in the 6 Months Following the Screening Test, Sensitivity Analysis including Mammograms as Cascade Events

**eTable 9.** Total and Out-of-Pocket Spending on Mammary Cascade Services, Extra-Mammary Cascade Services, and All Services Among Screening Breast MRI vs Mammography Recipients in the 6 Months Following the Screening Test, Including Spending on the Index Event

This supplemental material has been provided by the authors to give readers additional information about their work.

## Appendix 1. Relevant Choosing Wisely Recommendation

### ***Society of Surgical Oncology: Don't routinely use breast MRI for breast cancer screening in average risk women.***

MRI screening should be reserved for those at increased risk. Women considered at high risk include: known BRCA gene mutation carriers; untested first-degree relatives of known BRCA gene mutation carriers; those with a lifetime risk exceeding 20% as measured by risk-assessment tools based primarily on family history of breast cancer; and those with a clinical history associated with a significant risk for breast cancer, including women who received mantle radiation before the age of 30. MRI for screening after treatment for breast cancer is not indicated in women who would otherwise be considered average risk.

Source: [www.choosingwisely.org/clinician-lists/ss0-breast-mri-to-screen-average-risk-women/](http://www.choosingwisely.org/clinician-lists/ss0-breast-mri-to-screen-average-risk-women/)

**eTable 1.** Diagnosis and Procedure Codes Used in MRI and Mammography Cohort Selection

| <b>Billing Code Type</b>       | <b>Code</b>                                                                                                                                                                                                                                                                                                                                                                                                                                                                                                                                |
|--------------------------------|--------------------------------------------------------------------------------------------------------------------------------------------------------------------------------------------------------------------------------------------------------------------------------------------------------------------------------------------------------------------------------------------------------------------------------------------------------------------------------------------------------------------------------------------|
| Bilateral breast MRI           | 77059, C8906, C8907, C8908<br><b>Exclude if:</b><br>Diagnostic mammography (77066, G0204, G0279) or bilateral breast MRI in preceding 12 months<br>Breast cancer (C50.XXX, D05.1X, Z85.3, Z86.000) in preceding 12 months or on index MRI<br>Secondary breast cancer (198.81, C79.81) on index MRI<br>Any neoplasm (140.XX-239.XX; C00.X-D49.X) on index MRI<br>Device complications (996.54, 996.69, 996.79, T854, T857, T858, T868) on index MRI<br>Breast implant (793.8X, R92.X (Except, 793.82, R92.2 for dense breast)) on index MRI |
| Bilateral screening mammogram* | 77067, G0202, 77063<br><b>Exclude if:</b><br>Bilateral breast MRI in preceding 12 months<br>Breast cancer (C50.XXX, D05.1X, Z85.3, Z86.000) in preceding 12 months or on index MRI                                                                                                                                                                                                                                                                                                                                                         |

\*includes tomosynthesis; only counted as a single service if more than one of these coded on the same day

**eTable 2.** Diagnosis and Procedure Codes for Propensity to Receive Breast MRI

| <b>Category</b>                                                                                                                                                                                                                                           | <b>Codes (CPT and ICD-10)</b>                                                                                                                                                                                                                                                          |
|-----------------------------------------------------------------------------------------------------------------------------------------------------------------------------------------------------------------------------------------------------------|----------------------------------------------------------------------------------------------------------------------------------------------------------------------------------------------------------------------------------------------------------------------------------------|
| Family history of breast cancer                                                                                                                                                                                                                           | Z80.3                                                                                                                                                                                                                                                                                  |
| BRCA1/2 mutation                                                                                                                                                                                                                                          | Z15.01                                                                                                                                                                                                                                                                                 |
| Breast density                                                                                                                                                                                                                                            | R92.2                                                                                                                                                                                                                                                                                  |
| History of chest irradiation (including history of Hodgkin's Lymphoma)                                                                                                                                                                                    | Z92.3, Z85.71                                                                                                                                                                                                                                                                          |
| High-risk non-malignant breast lesion (atypical ductal hyperplasia, atypical lobular hyperplasia, lobular carcinoma in situ, flat epithelial atypia)                                                                                                      | N60.8X, N60.9X, D05.0X, D48.6X                                                                                                                                                                                                                                                         |
| Benign breast disease (breast cyst, diffuse cystic mastopathy, fibroadenosis of breast, fibrosclerosis of breast, Mammary Duct ectasia, hypertrophy of breast, mammographic microcalcification, abnormal and inconclusive findings on diagnostic imaging) | D24.X, N60.0X, N60.1X, N60.2X, N60.3X, N60.4X, N62, D05.8X, D05.9X, R92.0, R92.1, R92.8                                                                                                                                                                                                |
| Breast biopsy                                                                                                                                                                                                                                             | 19000, 19001, 19100, 19102, 19081-19086, 19120, 19125, 19126, 19101, 0HBT0ZZ, 0HBT3ZZ 0HBT0ZX, 0HBT3ZX, 0HBU0ZZ, 0HBU3ZZ, 0HBU0ZX, 0HBU3ZX 0HBV0ZZ, 0HBV3ZZ, 0HBV0ZX, 0HBV3ZX, 0HBW0ZZ, 0HBW3ZZ 0HBWXZZ, 0HBW0ZX, 0HBW3ZX, 0HBWXZX 0HBX0ZZ, 0HBX3ZZ, 0HBXXZZ 0HBX0ZX, 0HBX3ZX, 0HBXXZX |

**eTable 3.** Procedure Codes for Cascade Laboratory Tests

|                     | <b>Event type</b>                      | <b>Codes (CPT)</b>                                                       |
|---------------------|----------------------------------------|--------------------------------------------------------------------------|
| <b>Extramammary</b> | Complete blood count                   | 85025                                                                    |
|                     | Complete blood count with differential | 85027                                                                    |
|                     | Basic metabolic panel                  | 80048                                                                    |
|                     | Complete metabolic panel               | 80053                                                                    |
|                     | Hepatic panel                          | 80076                                                                    |
|                     | Thyroid function panel                 | 84443                                                                    |
| <b>Other</b>        | Cytopathology                          | 88172-3, 88177, 88305, 88307, 88309, 88104, 88106, 88108, 88112, 88160-2 |

**eTable 4.** Procedure Codes for Cascade Imaging Tests

|                                  | <b>Event type</b>                                                           | <b>Codes (CPT and ICD-10)</b>                                                                                                                                                                                     |
|----------------------------------|-----------------------------------------------------------------------------|-------------------------------------------------------------------------------------------------------------------------------------------------------------------------------------------------------------------|
| <b>Mammary</b>                   | Breast ultrasound                                                           | 76641-2, BH41ZZZ, BH40ZZZ, BH42ZZZ                                                                                                                                                                                |
|                                  | <i>Mammogram (only considered as cascade event in sensitivity analysis)</i> | 77051-2, 77055-7, 77065-7, 76376-7, 77061-3, G0202, G0204, G0206, G0279, BH00ZZZ, BH01ZZZ, BH02ZZZ                                                                                                                |
|                                  | Breast MRI                                                                  | 77058-9, 76498, 77046-9, C8903, C8904, C8905, C8906, C8907, C8908, S8042, BH30Y0Z, BH30YZZ, BH30ZZZ, BH31Y0Z, BH31YZZ, BH31ZZZ, BH32Y0Z, BH32YZZ, BH32ZZZ                                                         |
|                                  | Nuclear breast imaging                                                      | 78800-04, A4641, A4642, A9500, CH1YYZZ, CH2YYZZ, CH101ZZ, CH10SZZ, CH10YZZ, CH111ZZ, CH11SZZ, CH11YZZ, CH121ZZ, CH12SZZ, CH12YZZ, CH201ZZ, CH20SZZ, CH20YZZ, CH211ZZ, CH21SZZ, CH21YZZ, CH221ZZ, CH22SZZ, CH22YZZ |
|                                  | Thermography                                                                | 93740, 4A0ZXKZ                                                                                                                                                                                                    |
| <b>Extra-mammary</b>             | Thoracic cavity CT                                                          | 71260, 71250, 71270, BW2400Z, BW240ZZ, BW2410Z, BW241ZZ, BW24Y0Z, BW24YZZ, BW24ZZZ, BW2500Z, BW250ZZ, BW2510Z, BW251ZZ, BW25Y0Z, BW25YZZ, BW25ZZZ                                                                 |
|                                  | Abdominal CT                                                                | 74150, 74160, 74170, BW2000Z, BW200ZZ, BW2010Z, BW201ZZ, BW20Y0Z, BW20YZZ, BW20ZZZ                                                                                                                                |
|                                  | Abdomen/pelvis CT                                                           | 74176, 74177, 74178, BW2100Z, BW210ZZ, BW2110Z, BW211ZZ, BW21Y0Z, BW21YZZ, BW21ZZZ                                                                                                                                |
|                                  | Pelvic CT                                                                   | 72192, 72193, 72194, BW2G00Z, BW2G0ZZ, BW2G10Z, BW2G1ZZ, BW2GY0Z, BW2GYZZ, BW2GZZZ, BR2C0ZZ, BR2C1ZZ, BR2CYZZ, BR2CZZZ                                                                                            |
|                                  | Abdominal MRI                                                               | 74181, 74182, 74183, BW30Y0Z, BW30YZZ, BW30ZZZ                                                                                                                                                                    |
|                                  | Pelvic MRI                                                                  | 72195, 72196, 72197, BR3CY0Z, BR3CYZZ, BR3CZZZ                                                                                                                                                                    |
|                                  | Chest ultrasound                                                            | 76604, BH4BZZZ                                                                                                                                                                                                    |
|                                  | Retroperitoneal /pelvic/abdomen and pelvic ultrasound                       | 76770, 76775, 76856, 76857, BW4GZZZ, BW41ZZZ                                                                                                                                                                      |
|                                  | Rib x-ray                                                                   | 71110-1, 71101, 71100, 71120, 71130, BP0XZZZ, BP0YZZZ                                                                                                                                                             |
|                                  | Clavicle x-ray                                                              | 73000, BP04ZZZ, BP05ZZZ                                                                                                                                                                                           |
|                                  | Shoulder x-ray                                                              | 73020, 73030, 73040, BP080ZZ, BP081ZZ, BP08YZZ, BP08ZZZ, BP090ZZ, BP091ZZ, BP09YZZ, BP09ZZZ                                                                                                                       |
|                                  | Scapula x-ray                                                               | 73010, BP06ZZZ, BP07ZZZ                                                                                                                                                                                           |
|                                  | Sternum x-ray                                                               | BR0HZZZ                                                                                                                                                                                                           |
|                                  | Sacrum and coccyx x-ray                                                     | BR0FZZZ                                                                                                                                                                                                           |
|                                  | Spine x-ray                                                                 | 72020, BR0GZZ1, BR0GZZZ                                                                                                                                                                                           |
|                                  | Spine, cervical x-ray                                                       | 72040, 72050, 72052, BR00ZZ1, BR00ZZZ, BR010ZZ, BR011ZZ, BR01YZZ, BR01ZZZ                                                                                                                                         |
|                                  | Spine, thoracic x-ray                                                       | 72070, 72072, 72074, BR07ZZ1, BR07ZZZ, BR020ZZ, BR021ZZ, BR02YZZ, BR02ZZZ                                                                                                                                         |
| Spine, thoracic and lumbar x-ray | 72080, 72081, 72082, 72083, 72084,                                          |                                                                                                                                                                                                                   |

|  | <b>Event type</b>                                           | <b>Codes (CPT and ICD-10)</b>                                                                                                                                                                                                                                                                                                                                                                                                                                                                                                            |
|--|-------------------------------------------------------------|------------------------------------------------------------------------------------------------------------------------------------------------------------------------------------------------------------------------------------------------------------------------------------------------------------------------------------------------------------------------------------------------------------------------------------------------------------------------------------------------------------------------------------------|
|  | Spine, lumbosacral x-ray                                    | 72100, 72110, 72114, 72120, BR09ZZ1, BR09ZZZ, BR030ZZ, BR031ZZ, BR03YZZ, BR03ZZZ                                                                                                                                                                                                                                                                                                                                                                                                                                                         |
|  | Pelvis x-ray                                                | 72170, 72190, BR0CZZZ                                                                                                                                                                                                                                                                                                                                                                                                                                                                                                                    |
|  | All long bones x-ray                                        | BW0BZZZ                                                                                                                                                                                                                                                                                                                                                                                                                                                                                                                                  |
|  | Whole skeleton x-ray                                        | BW0LZZZ                                                                                                                                                                                                                                                                                                                                                                                                                                                                                                                                  |
|  | Nuclear medicine scans including bone, neck, chest, abdomen | 78300, 78305, 78306, 78315, 78320, CW131ZZ, CW231ZZ, CW141ZZ, CW241ZZ, CW161ZZ, CW261ZZ, CW101ZZ, CW201ZZ                                                                                                                                                                                                                                                                                                                                                                                                                                |
|  | Chest x-ray                                                 | 71045, 71046, 71047, 71048, 71020, 71030, 71034, 71035, 71010, BW03ZZZ                                                                                                                                                                                                                                                                                                                                                                                                                                                                   |
|  | Cardiac MRI                                                 | 75557, 75561, 75565,                                                                                                                                                                                                                                                                                                                                                                                                                                                                                                                     |
|  | Cardiac CT                                                  | 75571-4                                                                                                                                                                                                                                                                                                                                                                                                                                                                                                                                  |
|  | Renal angiography                                           | 36251-4, BT110ZZ, BT111ZZ, BT11YZZ, BT11ZZZ, BT120ZZ, BT121ZZ, BT12YZZ, BT12ZZZ, BT130ZZ, BT131ZZ, BT13YZZ, BT13ZZZ, B416010, B4160ZZ, B416110, B4161ZZ, B416Y10, B416YZZ, B416ZZZ, B417010, B4170ZZ, B417110, B4171ZZ, B417Y10, B417YZZ, B417ZZZ, B418010, B4180ZZ, B418110, B4181ZZ, B418Y10, B418YZZ, B418ZZZ, B51J0ZA, B51J0ZZ, B51J1ZA, B51J1ZZ, B51JYZA, B51JYZZ, B51JZZA, B51JZZZ, B51K0ZA, B51K0ZZ, B51K1ZA, B51K1ZZ, B51KYZA, B51KYZZ, B51KZZA, B51KZZZ, B51L0ZA, B51L0ZZ, B51L1ZA, B51L1ZZ, B51LYZA, B51LYZZ, B51LZZA, B51LZZZ |

**eTable 5.** Procedure Codes for Cascade Procedures

|                     | <b>Event type</b>                                                   | <b>Codes (CPT and ICD-10)</b>                                                                                                                                                                                                                                                                                                                                                                                                                                                                                                                                                                                                                                                                                                                                                                                                                                                                                                                     |
|---------------------|---------------------------------------------------------------------|---------------------------------------------------------------------------------------------------------------------------------------------------------------------------------------------------------------------------------------------------------------------------------------------------------------------------------------------------------------------------------------------------------------------------------------------------------------------------------------------------------------------------------------------------------------------------------------------------------------------------------------------------------------------------------------------------------------------------------------------------------------------------------------------------------------------------------------------------------------------------------------------------------------------------------------------------|
| <b>Mammary</b>      | Fine needle aspiration/core breast biopsy                           | 19000-1, 10021-2, 10004-12, 19100-3, 19081-6,                                                                                                                                                                                                                                                                                                                                                                                                                                                                                                                                                                                                                                                                                                                                                                                                                                                                                                     |
|                     | Lumpectomy/ mastectomy                                              | 19126, 19301-2, 19303-7                                                                                                                                                                                                                                                                                                                                                                                                                                                                                                                                                                                                                                                                                                                                                                                                                                                                                                                           |
|                     | Excisional breast biopsy                                            | 19120, 19125, 19101                                                                                                                                                                                                                                                                                                                                                                                                                                                                                                                                                                                                                                                                                                                                                                                                                                                                                                                               |
|                     | Breast imaging localization                                         | 19281-8                                                                                                                                                                                                                                                                                                                                                                                                                                                                                                                                                                                                                                                                                                                                                                                                                                                                                                                                           |
|                     | Lymph node biopsy/excision                                          | 38740, 38745, 38525, 38530, 38500, 38505                                                                                                                                                                                                                                                                                                                                                                                                                                                                                                                                                                                                                                                                                                                                                                                                                                                                                                          |
|                     | Breast repair/reconstruction                                        | 19350, 19357, 19361, 19364, 19366, 19367, 19368, 19369, S2066, S2067, S2068,                                                                                                                                                                                                                                                                                                                                                                                                                                                                                                                                                                                                                                                                                                                                                                                                                                                                      |
|                     | Breast radiation                                                    | 77014, 77371-3, 77385-7, 77401-4, 77406-9, 77411-4, 77416, 77418, 77421-5, 77469, 77520, 77522-3, 77525, 77750, 77761-3, 77767-8, 77770-2, 77776-8, 77785-7, 77789, 79200, 79300, 79403, 79440, 79445, G6002-17, Q3001, OHHT01Z, OHHT31Z, OHHT71Z, OHHT81Z, OHHTX1Z, OHHU01Z, OHHU31Z, OHHU71Z, OHHU81Z, OHHUX1Z, OHHV01Z, OHHV31Z, OHHV71Z, OHHV81Z, OHHVX1Z, OHHW01Z, OHHW31Z, OHHW71Z, OHHW81Z, OHHWX1Z, OHHX01Z, OHHX31Z, OHHX71Z, OHHX81Z, OHHXX1Z, DM000ZZ, DM001ZZ, DM002ZZ, DM003Z0, DM003ZZ, DM004ZZ, DM005ZZ, DM010ZZ, DM011ZZ, DM012ZZ, DM013Z0, DM013ZZ, DM014ZZ, DM015ZZ, DM1097Z, DM1098Z, DM1099Z, DM109BZ, DM109CZ, DM109YZ, DM10B7Z, DM10B8Z, DM10B9Z, DM10BBZ, DM10BCZ, DM10BYZ, DM1197Z, DM1198Z, DM1199Z, DM119BZ, DM119CZ, DM119YZ, DM11B7Z, DM11B8Z, DM11B9Z, DM11BBZ, DM11BCZ, DM11BYZ, DMY07ZZ, DMY0FZZ, DMY17ZZ, DMY1FZZ                                                                                                 |
| <b>Extramammary</b> | Liver biopsy, excision, and resection                               | 47000-1, 47100, 47379, 47700<br>0FB00ZX, 0FB00ZZ, 0FB03ZX, 0FB03ZZ, 0FB04ZX, 0FB04ZZ, 0FB10ZX, 0FB10ZZ, 0FB13ZX, 0FB13ZZ, 0FB14ZX, 0FB14ZZ, 0FB20ZX, 0FB20ZZ, 0FB23ZX, 0FB23ZZ, 0FB24ZX, 0FB24ZZ, 0FT00ZZ, 0FT04ZZ, 0FT10ZZ, 0FT14ZZ, 0FT20ZZ, 0FT24ZZ                                                                                                                                                                                                                                                                                                                                                                                                                                                                                                                                                                                                                                                                                            |
|                     | Cholecystectomy                                                     | 47562-4, 47600, 47605, 47610, 47612, 47620, 0FT40ZZ, 0FT44ZZ                                                                                                                                                                                                                                                                                                                                                                                                                                                                                                                                                                                                                                                                                                                                                                                                                                                                                      |
|                     | Lung biopsy, excision and resection of lungs, pleura, and diaphragm | 32400, 32405, 0BBC0ZX, 0BBC0ZZ, 0BBC3ZX, 0BBC3ZZ, 0BBC4ZX, 0BBC4ZZ, 0BBC7ZX, 0BBC7ZZ, 0BBC8ZX, 0BBC8ZZ, 0BBD0ZX, 0BBD0ZZ, 0BBD3ZX, 0BBD3ZZ, 0BBD4ZX, 0BBD4ZZ, 0BBD7ZX, 0BBD7ZZ, 0BBD8ZX, 0BBD8ZZ, 0BBF0ZX, 0BBF0ZZ, 0BBF3ZX, 0BBF3ZZ, 0BBF4ZX, 0BBF4ZZ, 0BBF7ZX, 0BBF7ZZ, 0BBF8ZX, 0BBF8ZZ, 0BBG0ZX, 0BBG0ZZ, 0BBG3ZX, 0BBG3ZZ, 0BBG4ZX, 0BBG4ZZ, 0BBG7ZX, 0BBG7ZZ, 0BBG8ZX, 0BBG8ZZ, 0BBJ0ZX, 0BBJ0ZZ, 0BBJ3ZX, 0BBJ3ZZ, 0BBJ4ZX, 0BBJ4ZZ, 0BBJ7ZX, 0BBJ7ZZ, 0BBJ8ZX, 0BBJ8ZZ, 0BBH0ZX, 0BBH0ZZ, 0BBH3ZX, 0BBH3ZZ, 0BBH4ZX, 0BBH4ZZ, 0BBH7ZX, 0BBH7ZZ, 0BBH8ZX, 0BBH8ZZ, 0BBK0ZX, 0BBK0ZZ, 0BBK3ZX, 0BBK3ZZ, 0BBK4ZX, 0BBK4ZZ, 0BBK7ZX, 0BBK7ZZ, 0BBK8ZX, 0BBK8ZZ, 0BBL0ZX, 0BBL0ZZ, 0BBL3ZX, 0BBL3ZZ, 0BBL4ZX, 0BBL4ZZ, 0BBL7ZX, 0BBL7ZZ, 0BBL8ZX, 0BBL8ZZ, 0BBM0ZX, 0BBM0ZZ, 0BBM3ZX, 0BBM3ZZ, 0BBM4ZX, 0BBM4ZZ, 0BBM7ZX, 0BBM7ZZ, 0BBM8ZX, 0BBM8ZZ, 0BB30ZX, 0BB30ZZ, 0BB33ZX, 0BB33ZZ, 0BB34ZX, 0BB34ZZ, 0BB37ZX, 0BB37ZZ, 0BB38ZX, 0BB38ZZ, |



|  | Event type                                                                           | Codes (CPT and ICD-10)                                                                                                                                                                                                                                                                                                                                                                                                                                                                                                                                                                                                                                                                                                                                                                                                                                                                                                                                                                                                                                                                                                                                                                                                                                                                                                                                                                                                                                                                                                                                                                                                                                                 |
|--|--------------------------------------------------------------------------------------|------------------------------------------------------------------------------------------------------------------------------------------------------------------------------------------------------------------------------------------------------------------------------------------------------------------------------------------------------------------------------------------------------------------------------------------------------------------------------------------------------------------------------------------------------------------------------------------------------------------------------------------------------------------------------------------------------------------------------------------------------------------------------------------------------------------------------------------------------------------------------------------------------------------------------------------------------------------------------------------------------------------------------------------------------------------------------------------------------------------------------------------------------------------------------------------------------------------------------------------------------------------------------------------------------------------------------------------------------------------------------------------------------------------------------------------------------------------------------------------------------------------------------------------------------------------------------------------------------------------------------------------------------------------------|
|  |                                                                                      | 0BB70ZX, 0BB70ZZ, 0BB73ZX, 0BB73ZZ, 0BB74ZX, 0BB74ZZ, 0BB77ZX, 0BB77ZZ, 0BB78ZX, 0BB78ZZ, 0BB40ZX, 0BB40ZZ, 0BB43ZX, 0BB43ZZ, 0BB44ZX, 0BB44ZZ, 0BB47ZX, 0BB47ZZ, 0BB48ZX, 0BB48ZZ, 0BB50ZX, 0BB50ZZ, 0BB53ZX, 0BB53ZZ, 0BB54ZX, 0BB54ZZ, 0BB57ZX, 0BB57ZZ, 0BB58ZX, 0BB58ZZ, 0BB60ZX, 0BB60ZZ, 0BB63ZX, 0BB63ZZ, 0BB64ZX, 0BB64ZZ, 0BB67ZX, 0BB67ZZ, 0BB68ZX, 0BB68ZZ, 0BB80ZX, 0BB80ZZ, 0BB83ZX, 0BB83ZZ, 0BB84ZX, 0BB84ZZ, 0BB87ZX, 0BB87ZZ, 0BB88ZX, 0BB88ZZ, 0BBB0ZX, 0BBB0ZZ, 0BBB3ZX, 0BBB3ZZ, 0BBB4ZX, 0BBB4ZZ, 0BBB7ZX, 0BBB7ZZ, 0BBB8ZX, 0BBB8ZZ, 0BB90ZX, 0BB90ZZ, 0BB93ZX, 0BB93ZZ, 0BB94ZX, 0BB94ZZ, 0BB97ZX, 0BB97ZZ, 0BB98ZX, 0BB98ZZ, 0BBN0ZX, 0BBN0ZZ, 0BBN3ZX, 0BBN3ZZ, 0BBN4ZX, 0BBN4ZZ, 0BBN8ZX, 0BBN8ZZ, 0BBP0ZX, 0BBP0ZZ, 0BBP3ZX, 0BBP3ZZ, 0BBP4ZX, 0BBP4ZZ, 0BBP8ZX, 0BBP8ZZ, 0BBT0ZX, 0BBT0ZZ, 0BBT3ZX, 0BBT3ZZ, 0BBT4ZX, 0BBT4ZZ, 0BTC0ZZ, 0BTC4ZZ, 0BTD0ZZ, 0BTD4ZZ, 0BTF0ZZ, 0BTF4ZZ, 0BTG0ZZ, 0BTG4ZZ, 0BTJ0ZZ, 0BTJ4ZZ, 0BTK0ZZ, 0BTK4ZZ, 0BTL0ZZ, 0BTL4ZZ, 0BTM0ZZ, 0BTM4ZZ, 0BTH0ZZ, 0BTH4ZZ, 0BT40ZZ, 0BT44ZZ, 0BT50ZZ, 0BT54ZZ, 0BT60ZZ, 0BT64ZZ, 0BT80ZZ, 0BT84ZZ, 0BTB0ZZ, 0BTB4ZZ, 0BT30ZZ, 0BT34ZZ, 0BT70ZZ, 0BT74ZZ, 0BT90ZZ, 0BT94ZZ, 0BTT0ZZ, 0BTT4ZZ                                                                                                                                                                                                                                                                                                                                                                                                                                                                         |
|  | Thoracotomy                                                                          | 32100, 32110, 32120, 32124, 32140, 32141, 32150, 32151, 32160, 32505, 32506, 32507, 32096, 32097, 32098,                                                                                                                                                                                                                                                                                                                                                                                                                                                                                                                                                                                                                                                                                                                                                                                                                                                                                                                                                                                                                                                                                                                                                                                                                                                                                                                                                                                                                                                                                                                                                               |
|  | Thorascopy, excision of heart, resection of heart, extirpation of matter from thorax | 32601, 32604, 32606, 32607, 32608, 32609, 32650, 32651, 32652, 32653, 32654, 32655, 32656, 32658, 32659, 32661, 32662, 32663, 32664, 32665, 32666, 32667, 32668, 32669, 32670, 32671, 32672, 32673, 32674, 0WJ93ZZ, 0WJ94ZZ, 0WJB0ZZ, 0WJB3ZZ, 0WJB4ZZ, 0WJC0ZZ, 0WJC3ZZ, 0WJC4ZZ, 0WJD0ZZ, 0WJD3ZZ, 0WJD4ZZ, 0WJ80ZZ, 0WJ83ZZ, 0WJ84ZZ, 0WJ8XZZ, 02JA0ZZ, 02JA3ZZ, 02JA4ZZ, 02JY0ZZ, 02JY3ZZ, 02JY4ZZ, 0BJ00ZZ, 0BJ03ZZ, 0BJ04ZZ, 0BJ07ZZ, 0BJ08ZZ, 0BJ0XZZ, 0BJ10ZZ, 0BJ13ZZ, 0BJ14ZZ, 0BJ17ZZ, 0BJ18ZZ, 0BJ1XZZ, 0BJK0ZZ, 0BJK3ZZ, 0BJK4ZZ, 0BJK7ZZ, 0BJK8ZZ, 0BJKXZZ, 0BJL0ZZ, 0BJL3ZZ, 0BJL4ZZ, 0BJL7ZZ, 0BJL8ZZ, 0BJLXZZ, 0BJQ0ZZ, 0BJQ3ZZ, 0BJQ4ZZ, 0BJQ7ZZ, 0BJQ8ZZ, 0BJQXZZ, 0BJT0ZZ, 0BJT3ZZ, 0BJT4ZZ, 0BJT7ZZ, 0BJT8ZZ, 0BJTXZZ, 02B40ZX, 02B40ZZ, 02B43ZX, 02B43ZZ, 02B44ZX, 02B44ZZ, 02B50ZX, 02B50ZZ, 02B53ZX, 02B53ZZ, 02B54ZX, 02B54ZZ, 02B60ZX, 02B60ZZ, 02B63ZX, 02B63ZZ, 02B64ZX, 02B64ZZ, 02B70ZX, 02B70ZZ, 02B73ZX, 02B73ZZ, 02B74ZX, 02B74ZZ, 02B80ZX, 02B80ZZ, 02B83ZX, 02B83ZZ, 02B84ZX, 02B84ZZ, 02B90ZX, 02B90ZZ, 02B93ZX, 02B93ZZ, 02B94ZX, 02B94ZZ, 02BD0ZX, 02BD0ZZ, 02BD3ZX, 02BD3ZZ, 02BD4ZX, 02BD4ZZ, 02BF0ZX, 02BF0ZZ, 02BF3ZX, 02BF3ZZ, 02BF4ZX, 02BF4ZZ, 02BG0ZX, 02BG0ZZ, 02BG3ZX, 02BG3ZZ, 02BG4ZX, 02BG4ZZ, 02BH0ZX, 02BH0ZZ, 02BH3ZX, 02BH3ZZ, 02BH4ZX, 02BH4ZZ, 02BJ0ZX, 02BJ0ZZ, 02BJ3ZX, 02BJ3ZZ, 02BJ4ZX, 02BJ4ZZ, 02BK0ZX, 02BK0ZZ, 02BK3ZX, 02BK3ZZ, 02BK4ZX, 02BK4ZZ, 02BL0ZX, 02BL0ZZ, 02BL3ZX, 02BL3ZZ, 02BL4ZX, 02BL4ZZ, 02BM0ZX, 02BM0ZZ, 02BM3ZX, 02BM3ZZ, 02BM4ZX, 02BM4ZZ, 02BN0ZX, 02BN0ZZ, 02BN3ZX, 02BN3ZZ, 02BN4ZX, 02BN4ZZ, 02BP0ZX, 02BP0ZZ, 02BP3ZX, 02BP3ZZ, 02BP4ZX, 02BP4ZZ, 02BQ0ZX, 02BQ0ZZ, 02BQ3ZX, |

|  | Event type                                      | Codes (CPT and ICD-10)                                                                                                                                                                                                                                                                                                                                                                                                                                                                                                                                                                                                                                                                                                                                                                                                                                                                                                                                                                                                                                                                                                                                                                                                                                                                                                                                                                                                                                                                                                                                                                                                                                                                                                                                                                                                                                                                                                                                                                                                                                                                                                                                                                                                                                                                                        |
|--|-------------------------------------------------|---------------------------------------------------------------------------------------------------------------------------------------------------------------------------------------------------------------------------------------------------------------------------------------------------------------------------------------------------------------------------------------------------------------------------------------------------------------------------------------------------------------------------------------------------------------------------------------------------------------------------------------------------------------------------------------------------------------------------------------------------------------------------------------------------------------------------------------------------------------------------------------------------------------------------------------------------------------------------------------------------------------------------------------------------------------------------------------------------------------------------------------------------------------------------------------------------------------------------------------------------------------------------------------------------------------------------------------------------------------------------------------------------------------------------------------------------------------------------------------------------------------------------------------------------------------------------------------------------------------------------------------------------------------------------------------------------------------------------------------------------------------------------------------------------------------------------------------------------------------------------------------------------------------------------------------------------------------------------------------------------------------------------------------------------------------------------------------------------------------------------------------------------------------------------------------------------------------------------------------------------------------------------------------------------------------|
|  |                                                 | 02BQ3ZZ, 02BQ4ZX, 02BQ4ZZ, 02BR0ZX, 02BR0ZZ, 02BR3ZX, 02BR3ZZ, 02BR4ZX, 02BR4ZZ, 02BS0ZX, 02BS0ZZ, 02BS3ZX, 02BS3ZZ, 02BS4ZX, 02BS4ZZ, 02BT0ZX, 02BT0ZZ, 02BT3ZX, 02BT3ZZ, 02BT4ZX, 02BT4ZZ, 02BV0ZX, 02BV0ZZ, 02BV3ZX, 02BV3ZZ, 02BV4ZX, 02BV4ZZ, 02BW0ZX, 02BW0ZZ, 02BW3ZX, 02BW3ZZ, 02BW4ZX, 02BW4ZZ, 02BX0ZX, 02BX0ZZ, 02BX3ZX, 02BX3ZZ, 02BX4ZX, 02BX4ZZ, 02T50ZZ, 02T53ZZ, 02T54ZZ, 02T80ZZ, 02T83ZZ, 02T84ZZ, 02T90ZZ, 02T93ZZ, 02T94ZZ, 02TD0ZZ, 02TD3ZZ, 02TD4ZZ, 02TH0ZZ, 02TH3ZZ, 02TH4ZZ, 02TM0ZZ, 02TM3ZZ, 02TM4ZZ, 02TN0ZZ, 02TN3ZZ, 02TN4ZZ, 0BC30ZZ, 0BC33ZZ, 0BC34ZZ, 0BC37ZZ, 0BC38ZZ, 0BC40ZZ, 0BC43ZZ, 0BC44ZZ, 0BC47ZZ, 0BC48ZZ, 0BC50ZZ, 0BC53ZZ, 0BC54ZZ, 0BC57ZZ, 0BC58ZZ, 0BC60ZZ, 0BC63ZZ, 0BC64ZZ, 0BC67ZZ, 0BC68ZZ, 0BC70ZZ, 0BC73ZZ, 0BC74ZZ, 0BC77ZZ, 0BC78ZZ, 0BC80ZZ, 0BC83ZZ, 0BC84ZZ, 0BC87ZZ, 0BC88ZZ, 0BC90ZZ, 0BC93ZZ, 0BC94ZZ, 0BC97ZZ, 0BC98ZZ, 0BCB0ZZ, 0BCB3ZZ, 0BCB4ZZ, 0BCB7ZZ, 0BCB8ZZ, 0BCC0ZZ, 0BCC3ZZ, 0BCC4ZZ, 0BCC7ZZ, 0BCC8ZZ, 0BCD0ZZ, 0BCD3ZZ, 0BCD4ZZ, 0BCD7ZZ, 0BCD8ZZ, 0BCF0ZZ, 0BCF3ZZ, 0BCF4ZZ, 0BCF7ZZ, 0BCF8ZZ, 0BCG0ZZ, 0BCG3ZZ, 0BCG4ZZ, 0BCG7ZZ, 0BCG8ZZ, 0BCH0ZZ, 0BCH3ZZ, 0BCH4ZZ, 0BCH7ZZ, 0BCH8ZZ, 0BCJ0ZZ, 0BCJ3ZZ, 0BCJ4ZZ, 0BCJ7ZZ, 0BCJ8ZZ, 0BCK0ZZ, 0BCK3ZZ, 0BCK4ZZ, 0BCK7ZZ, 0BCK8ZZ, 0BCL0ZZ, 0BCL3ZZ, 0BCL4ZZ, 0BCL7ZZ, 0BCL8ZZ, 0BCM0ZZ, 0BCM3ZZ, 0BCM4ZZ, 0BCM7ZZ, 0BCM8ZZ, 0BCN0ZZ, 0BCN3ZZ, 0BCN4ZZ, 0BCP0ZZ, 0BCP3ZZ, 0BCP4ZZ, 0BCT0ZZ, 0BCT3ZZ, 0BCT4ZZ, 02C00Z6, 02C00ZZ, 02C03Z6, 02C03ZZ, 02C04Z6, 02C04ZZ, 02C10Z6, 02C10ZZ, 02C13Z6, 02C13ZZ, 02C14Z6, 02C14ZZ, 02C20Z6, 02C20ZZ, 02C23Z6, 02C23ZZ, 02C24Z6, 02C24ZZ, 02C30Z6, 02C30ZZ, 02C33Z6, 02C33ZZ, 02C34Z6, 02C34ZZ, 02C40ZZ, 02C43ZZ, 02C44ZZ, 02C50ZZ, 02C53ZZ, 02C54ZZ, 02C60ZZ, 02C63ZZ, 02C64ZZ, 02C70ZZ, 02C73ZZ, 02C74ZZ, 02C80ZZ, 02C83ZZ, 02C84ZZ, 02C90ZZ, 02C93ZZ, 02C94ZZ, 02CD0ZZ, 02CD3ZZ, 02CD4ZZ, 02CF0ZZ, 02CF3ZZ, 02CF4ZZ, 02CG0ZZ, 02CG3ZZ, 02CG4ZZ, 02CH0ZZ, 02CH3ZZ, 02CH4ZZ, 02CJ0ZZ, 02CJ3ZZ, 02CJ4ZZ, 02CK0ZZ, 02CK3ZZ, 02CK4ZZ, 02CL0ZZ, 02CL3ZZ, 02CL4ZZ, 02CM0ZZ, 02CM3ZZ, 02CM4ZZ, 02CN0ZZ, 02CN3ZZ, 02CN4ZZ, 02CP0ZZ, 02CP3ZZ, 02CP4ZZ, 02CQ0ZZ, 02CQ3ZZ, 02CQ4ZZ, 02CR0ZZ, 02CR3ZZ, 02CR4ZZ, 02CS0ZZ, 02CS3ZZ, 02CS4ZZ, 02CT0ZZ, 02CT3ZZ, 02CT4ZZ, 02CV0ZZ, 02CV3ZZ, 02CV4ZZ, 02CW0ZZ, 02CW3ZZ, 02CW4ZZ, 02CX0ZZ, 02CX3ZZ, 02CX4ZZ |
|  | Mediastinoscopy                                 | 39000, 39010, 39401, 39402, 0WJC4ZZ                                                                                                                                                                                                                                                                                                                                                                                                                                                                                                                                                                                                                                                                                                                                                                                                                                                                                                                                                                                                                                                                                                                                                                                                                                                                                                                                                                                                                                                                                                                                                                                                                                                                                                                                                                                                                                                                                                                                                                                                                                                                                                                                                                                                                                                                           |
|  | Bronchoscopy                                    | 31622-38, 31640-1, 31643, 31645-9, 31651-4 31660-1,                                                                                                                                                                                                                                                                                                                                                                                                                                                                                                                                                                                                                                                                                                                                                                                                                                                                                                                                                                                                                                                                                                                                                                                                                                                                                                                                                                                                                                                                                                                                                                                                                                                                                                                                                                                                                                                                                                                                                                                                                                                                                                                                                                                                                                                           |
|  | Transthoracic echocardiogram, including Doppler | 93303, 93304, 93306, 93307, 93308, 93350, 93351, 93352, 0439T, 93320-1, 93325<br>B244ZZZ, B244ZZ3, B244YZZ, B245YZZ, B245ZZZ, B245ZZ3, B246YZZ, B246ZZ3, B246ZZZ, B24BYZZ, B24BZZ3, B24BZZZ                                                                                                                                                                                                                                                                                                                                                                                                                                                                                                                                                                                                                                                                                                                                                                                                                                                                                                                                                                                                                                                                                                                                                                                                                                                                                                                                                                                                                                                                                                                                                                                                                                                                                                                                                                                                                                                                                                                                                                                                                                                                                                                   |
|  | Transesophageal echocardiogram                  | 93312, 93313, 93314, 93315, 93316, 93317, 93318, 93355, B244ZZ4, B245ZZ4, B246ZZ4, B24BZZ4, B24CZZ4, B24OZZ4, B241ZZ4                                                                                                                                                                                                                                                                                                                                                                                                                                                                                                                                                                                                                                                                                                                                                                                                                                                                                                                                                                                                                                                                                                                                                                                                                                                                                                                                                                                                                                                                                                                                                                                                                                                                                                                                                                                                                                                                                                                                                                                                                                                                                                                                                                                         |
|  | Thyroid cyst aspiration                         | 60300, 10022                                                                                                                                                                                                                                                                                                                                                                                                                                                                                                                                                                                                                                                                                                                                                                                                                                                                                                                                                                                                                                                                                                                                                                                                                                                                                                                                                                                                                                                                                                                                                                                                                                                                                                                                                                                                                                                                                                                                                                                                                                                                                                                                                                                                                                                                                                  |

|  | Event type                                         | Codes (CPT and ICD-10)                                                                                                                                                                                                                                                                                                                                                                                                                              |
|--|----------------------------------------------------|-----------------------------------------------------------------------------------------------------------------------------------------------------------------------------------------------------------------------------------------------------------------------------------------------------------------------------------------------------------------------------------------------------------------------------------------------------|
|  | Thyroid biopsy, excision                           | 60100, 76940, 76942, 77012, 77021<br>0GBG3ZX, 0GBH3ZX, 0GBJ3ZX,                                                                                                                                                                                                                                                                                                                                                                                     |
|  | Thyroidectomy                                      | 60210, 60212, 60220, 60225, 60240, 60252, 60254, 60260, 60270, 60271,<br>0GTG0ZZ, 0GTG4ZZ, 0GTH0ZZ, 0GTH4ZZ, 0GTJ0ZZ, 0GTJ4ZZ, 0GTK0ZZ, 0GTK4ZZ                                                                                                                                                                                                                                                                                                     |
|  | Retroperitoneal, Renal biopsy                      | 49180, 50200, 50205<br>0WBH0ZX, 0WBH0ZZ, 0WBH3ZX, 0WBH3ZZ, 0WBH4ZX, 0WBH4ZZ, 0TB00ZX, 0TB00ZZ, 0TB03ZX, 0TB03ZZ, 0TB04ZX, 0TB04ZZ, 0TB07ZX, 0TB07ZZ, 0TB08ZX, 0TB08ZZ, 0TB10ZX, 0TB10ZZ, 0TB13ZX, 0TB13ZZ, 0TB14ZX, 0TB14ZZ, 0TB17ZX, 0TB17ZZ, 0TB18ZX, 0TB18ZZ, 0TB18ZZ, 0TB30ZZ, 0TB33ZX, 0TB33ZZ, 0TB34ZX, 0TB34ZZ, 0TB37ZX, 0TB37ZZ, 0TB38ZX, 0TB38ZZ, 0TB40ZX, 0TB40ZZ, 0TB43ZX, 0TB43ZZ, 0TB44ZX, 0TB44ZZ, 0TB47ZX, 0TB47ZZ, 0TB48ZX, 0TB48ZZ |
|  | Nephrectomy, resection of kidneys, ureter, bladder | 50543, 50545, 50548, 50220, 50225, 50230, 50234, 50236, 50240<br>0TT00ZZ, 0TT04ZZ, 0TT10ZZ, 0TT14ZZ, 0TT20ZZ, 0TT24ZZ, 0TT30ZZ, 0TT34ZZ, 0TT37ZZ, 0TT38ZZ, 0TT40ZZ, 0TT44ZZ, 0TT47ZZ, 0TT48ZZ, 0TT60ZZ, 0TT64ZZ, 0TT67ZZ, 0TT68ZZ, 0TT70ZZ, 0TT74ZZ, 0TT77ZZ, 0TT78ZZ, 0TTB0ZZ, 0TTB4ZZ, 0TTB7ZZ, 0TTB8ZZ, 0TTC0ZZ, 0TTC4ZZ, 0TTC7ZZ, 0TTC8ZZ, 0TTD0ZZ, 0TTD4ZZ, 0TTD7ZZ, 0TTD8ZZ                                                                   |
|  | Renal laparoscopy                                  | 50541, 50542, 50543, 50544, 50545, 50546, 50547, 50548, 50549                                                                                                                                                                                                                                                                                                                                                                                       |
|  | Lithotripsy                                        | 50590<br>0TF30ZZ, 0TF33ZZ, 0TF34ZZ, 0TF37ZZ, 0TF38ZZ, 0TF3XZZ, 0TF40ZZ, 0TF43ZZ, 0TF44ZZ, 0TF47ZZ, 0TF48ZZ, 0TF4XZZ, 0TF60ZZ, 0TF63ZZ, 0TF64ZZ, 0TF67ZZ, 0TF68ZZ, 0TF6XZZ, 0TF70ZZ, 0TF73ZZ, 0TF74ZZ, 0TF77ZZ, 0TF78ZZ, 0TF7XZZ, 0TFB0ZZ, 0TFB3ZZ, 0TFB4ZZ, 0TFB7ZZ, 0TFB8ZZ, 0TFBXZZ, 0TFC0ZZ, 0TFC3ZZ, 0TFC4ZZ, 0TFC7ZZ, 0TFC8ZZ, 0TFCXZZ, 0TFD0ZZ, 0TFD3ZZ, 0TFD4ZZ, 0TFD7ZZ, 0TFD8ZZ, 0TFDXZZ                                                   |
|  | Litholapaxy                                        | 52317-8<br>0TCB0ZZ, 0TCB3ZZ, 0TCB4ZZ, 0TCB7ZZ, 0TCB8ZZ                                                                                                                                                                                                                                                                                                                                                                                              |
|  | Renal ablation                                     | 50592-3, 50250<br>0T500ZZ, 0T503ZZ, 0T504ZZ, 0T507ZZ, 0T508ZZ, 0T510ZZ, 0T513ZZ, 0T514ZZ, 0T517ZZ, 0T518ZZ                                                                                                                                                                                                                                                                                                                                          |
|  | Cystourethroscopy                                  | 52000-1, 52005, 52007, 52010, 52204, 52214, 52224, 52234-5, 52240, 52250, 52260, 52265, 52270, 52276-7, 52281-3, 52285, 52287, 52290, 52300, 52301, 52305, 52310, 52315, 52320, 52325, 52327, 52330, 52332, 52334, 52341-6, 52351-6                                                                                                                                                                                                                 |
|  | Magnetic resonance cholangiopancreatography        | S8037                                                                                                                                                                                                                                                                                                                                                                                                                                               |

**eTable 6.** Procedure codes for cascade visits and Specialty Codes for Cascade Specialty Visits

**A. Procedure Codes for Cascade Visits**

Visits were defined based on the following HCPCS codes:

|                      |                                                                                                                                                                                                                  |
|----------------------|------------------------------------------------------------------------------------------------------------------------------------------------------------------------------------------------------------------|
| <b>Codes (HCPCS)</b> | 99201, 99202, 99203, 99204, 99205, 99206, 99207, 99208, 99209, 99210, 99211, 99212, 99213, 99214, 99215, 99381, 99382, 99383, 99384, 99385, 99386, 99387, 99391, 99392, 99393, 99394, 99395, 99396, 99397, G0463 |
|----------------------|------------------------------------------------------------------------------------------------------------------------------------------------------------------------------------------------------------------|

We analyzed visits with specialists relevant to mammary and extramammary findings, respectively:

**B. Specialty codes for cascade specialty visits**

|                     | <b>Specialties</b>                                                                                                                                                                                                                                                                                      | <b>Specialty codes</b>                                                                                       |
|---------------------|---------------------------------------------------------------------------------------------------------------------------------------------------------------------------------------------------------------------------------------------------------------------------------------------------------|--------------------------------------------------------------------------------------------------------------|
| <b>Mammary</b>      | Oncology (including medical, radiation), General surgery, Internal medicine, Preventive medicine, NP, PA                                                                                                                                                                                                | 380, 500, 505, 204, 360, 825, 845                                                                            |
| <b>Extramammary</b> | General surgery, Colorectal surgery, Cardiothoracic surgery, Vascular surgery, Gastroenterology, Cardiology, Pulmonology, Rheumatology, Orthopedics, Oncology (including medical, radiation), Hematology, Infectious disease, Endocrinology, Nephrology, Internal medicine, Preventive medicine, NP, PA | 500, 505, 510, 535, 540, 580, 585, 550, 275, 250, 295, 300, 530, 380, 280, 285, 270, 290, 204, 360, 825, 845 |

**eTable 7.** Diagnosis Codes for Cascade New Diagnoses<sup>a</sup>

| Organ/category      | ICD-10 codes                                                                                                                                                                                                                                                                                                                                                                                                                                                                                                                                                                                                                                                                                                                                                                                                                                                                                                                                                                                                                                                                                                                                                                                                                                                                                                                                                                                                                                                                                                                                |
|---------------------|---------------------------------------------------------------------------------------------------------------------------------------------------------------------------------------------------------------------------------------------------------------------------------------------------------------------------------------------------------------------------------------------------------------------------------------------------------------------------------------------------------------------------------------------------------------------------------------------------------------------------------------------------------------------------------------------------------------------------------------------------------------------------------------------------------------------------------------------------------------------------------------------------------------------------------------------------------------------------------------------------------------------------------------------------------------------------------------------------------------------------------------------------------------------------------------------------------------------------------------------------------------------------------------------------------------------------------------------------------------------------------------------------------------------------------------------------------------------------------------------------------------------------------------------|
| <b>Mammary</b>      |                                                                                                                                                                                                                                                                                                                                                                                                                                                                                                                                                                                                                                                                                                                                                                                                                                                                                                                                                                                                                                                                                                                                                                                                                                                                                                                                                                                                                                                                                                                                             |
| Breast              | C50.XXX, D05.1X, C79.81, N60.8X, N60.9X, D05.0X, D48.6X, D24.X, N60.0X, N60.1X, N60.2X, N60.3X, N60.4X, N62, D05.8X, D05.9X, R92.0, R92.1, R92.8, N64.1, N64.59                                                                                                                                                                                                                                                                                                                                                                                                                                                                                                                                                                                                                                                                                                                                                                                                                                                                                                                                                                                                                                                                                                                                                                                                                                                                                                                                                                             |
| <b>Extramammary</b> |                                                                                                                                                                                                                                                                                                                                                                                                                                                                                                                                                                                                                                                                                                                                                                                                                                                                                                                                                                                                                                                                                                                                                                                                                                                                                                                                                                                                                                                                                                                                             |
| Liver               | K70.0, K70.10, K70.11, K70.2, K70.30, K70.31, K70.40, K70.41, K70.9, K71.0, K71.11, K71.7, K71.8, K71.9, K72.00, K72.01, K72.10, K72.11, K72.90, K72.91, K74.0, K74.1, K74.2, K74.3, K74.4, K74.5, K74.60, K74.69, K75.0, K75.1, K75.81, K75.89, K75.9, K76.0, K76.1, K76.2, K76.3, K76.5, K76.6, K76.7, K76.81, K76.89, K76.9, K77, R16.0, R16.2, D13.4, C22, C22.0, C22.1, C22.2, C22.3, C22.4, C22.7, C22.8, C22.9, C78.7, B15.0, B15.9, B16.0, B16.1, B16.2, B16.9, B17.0, B17.10, B17.11, B17.2, B17.8, B17.9, B18.0, B18.1, B18.2, B18.8, B18.9, B19.0, B19.10, B19.11, B19.20, B19.21, B19.9, Q44, Q44.0, Q44.1, Q44.2, Q44.3, Q44.4, Q44.5, Q44.6, Q44.7, D18.03, B67.8, R93.2                                                                                                                                                                                                                                                                                                                                                                                                                                                                                                                                                                                                                                                                                                                                                                                                                                                      |
| Gallbladder         | K80, K80.0, K80.00, K80.01, K80.1, K80.10, K80.11, K80.12, K80.13, K80.18, K80.19, K80.2, K80.20, K80.21, K80.3, K80.30, K80.31, K80.32, K80.33, K80.34, K80.35, K80.36, K80.37, K80.4, K80.40, K80.41, K80.42, K80.43, K80.44, K80.45, K80.46, K80.47, K80.5, K80.50, K80.51, K80.6, K80.60, K80.61, K80.62, K80.63, K80.64, K80.65, K80.66, K80.67, K80.7, K80.70, K80.71, K80.8, K80.80, K80.81, K82, K82.0, K82.1, K82.2, K82.3, K82.4, K82.8, K82.9, K82.A, K82.A1, K82.A2, K87, C23, C24.8, C24.9, S36.1, S36.11, S36.112, S36.112A, S36.112D, S36.112S, S36.113, S36.113A, S36.113D, S36.113S, S36.114, S36.114A, S36.114D, S36.114S, S36.115, S36.115A, S36.115D, S36.115S, S36.116, S36.116A, S36.116D, S36.116S, S36.118, S36.118A, S36.118D, S36.118S, S36.119, S36.119A, S36.119D, S36.119S, S36.12, S36.122, S36.122A, S36.122D, S36.122S, S36.123, S36.123A, S36.123D, S36.123S, S36.128, S36.128A, S36.128D, S36.128S, S36.129, S36.129A, S36.13, S36.13XA, S36.13XD, S36.13XS, D37.6, D13.5, D01.5, K83, K83.0, K83.01, K83.09, K83.1, K83.2, K83.3, K83.4, K83.5, K83.8, K83.9, O26.6, O26.61, O26.611, O26.612, O26.613, O26.619, O26.62, O26.63                                                                                                                                                                                                                                                                                                                                                                          |
| Pancreas            | K86.0, K86.1, K86.2, K86.3, K86.8, K86.81, K86.89, K86.9, K85, K85.0, K85.00, K85.01, K85.02, K85.1, K85.10, K85.11, K85.12, K85.2, K85.20, K85.21, K85.22, K85.3, K85.30, K85.31, K85.32, K85.8, K85.80, K85.81, K85.82, K85.9, K85.90, K85.92, C25, C25.0, C25.1, C25.2, C25.3, C25.4, C25.7, C25.8, C25.9, D13.6, D13.7, D37.8, D01.7, S36.2, S36.20, S36.200, S36.200A, S36.200D, S36.200S, S36.201, S36.201A, S36.201D, S36.201S, S36.202, S36.202A, S36.202D, S36.202S, S36.209, S36.209A, S36.209D, S36.209S, S36.22, S36.220, S36.220A, S36.220D, S36.220S, S36.221, S36.221A, S36.221D, S36.221S, S36.222, S36.222A, S36.222D, S36.222S, S36.229, S36.229A, S36.229D, S36.229S, S36.23, S36.230, S36.230A, S36.230D, S36.230S, S36.231, S36.231A, S36.231D, S36.231S, S36.232, S36.232A, S36.232D, S36.232S, S36.239, S36.239A, S36.239D, S36.239S, S36.24, S36.240, S36.240A, S36.240D, S36.240S, S36.241, S36.241A, S36.241D, S36.241S, S36.242, S36.242A, S36.242D, S36.242S, S36.249, S36.249A, S36.249D, S36.249S, S36.25, S36.250, S36.250A, S36.250D, S36.250S, S36.251, S36.251A, S36.251D, S36.251S, S36.252, S36.252A, S36.252D, S36.252S, S36.259, S36.259A, S36.259D, S36.259S, S36.26, S36.260, S36.260A, S36.260D, S36.260S, S36.261, S36.261A, S36.261D, S36.261S, S36.262, S36.262A, S36.262D, S36.262S, S36.269, S36.269A, S36.269D, S36.269S, S36.29, S36.290, S36.290A, S36.290D, S36.290S, S36.291, S36.291A, S36.291D, S36.291S, S36.292, S36.292A, S36.292D, S36.292S, S36.299, S36.299A, S36.299D, S36.299S |
| Thymus              | C37, D15.0, E32.1                                                                                                                                                                                                                                                                                                                                                                                                                                                                                                                                                                                                                                                                                                                                                                                                                                                                                                                                                                                                                                                                                                                                                                                                                                                                                                                                                                                                                                                                                                                           |

| Organ/category                   | ICD-10 codes                                                                                                                                                                                                                                                                                                                                                                                                                                                                                                                                                                                                                                                                                                                                                                                                                                                                                                                                                                                                                                                                                                                                                                                                                                                                                                                                                                                                                                                                                                                                                                                                                                                                                                                                                                                                                                                                                                                                                                                                                                                                                                                                                                                                                                                                                                                                                                                                                                                                                                                                                                                                                                                                                                                                                                                                                                                                                                                                                                                                                                                                                                                        |
|----------------------------------|-------------------------------------------------------------------------------------------------------------------------------------------------------------------------------------------------------------------------------------------------------------------------------------------------------------------------------------------------------------------------------------------------------------------------------------------------------------------------------------------------------------------------------------------------------------------------------------------------------------------------------------------------------------------------------------------------------------------------------------------------------------------------------------------------------------------------------------------------------------------------------------------------------------------------------------------------------------------------------------------------------------------------------------------------------------------------------------------------------------------------------------------------------------------------------------------------------------------------------------------------------------------------------------------------------------------------------------------------------------------------------------------------------------------------------------------------------------------------------------------------------------------------------------------------------------------------------------------------------------------------------------------------------------------------------------------------------------------------------------------------------------------------------------------------------------------------------------------------------------------------------------------------------------------------------------------------------------------------------------------------------------------------------------------------------------------------------------------------------------------------------------------------------------------------------------------------------------------------------------------------------------------------------------------------------------------------------------------------------------------------------------------------------------------------------------------------------------------------------------------------------------------------------------------------------------------------------------------------------------------------------------------------------------------------------------------------------------------------------------------------------------------------------------------------------------------------------------------------------------------------------------------------------------------------------------------------------------------------------------------------------------------------------------------------------------------------------------------------------------------------------------|
| Lungs                            | J90, J91.0, J91, J91.8, J94.0, R91, R91.1, R91.8, J15, J15.0, J15.1, J15.2, J15.20, J15.21, J15.211, J15.212, J15.29, J15.3, J15.4, J15.5, J15.6, J15.7, J15.8, J15.9, J16, J16.0, J16.8, J12, J12.0, J12.1, J12.2, J12.3, J12.8, J12.81, J12.82, J12.89, J12.9, J13, J84.2, J17, J85, J85.0, J85.1, J85.2, J85.3, J98.1, J98.11, J98.19, Q33.0, J98.4, C34, C34.0, C34.00, C34.01, C34.02, C34.1, C34.10, C34.11, C34.12, C34.2, C34.3, C34.30, C34.31, C34.32, C34.8, C34.80, C34.81, C34.82, C34.9, C34.90, C34.91, C34.92, J40, J41.0, J41.1, J41.8, J42, J43.0, J43.1, J43.2, J43.8, J43.9, J44.0, J44.1, J44.9, J47.0, J47.1, J47.9                                                                                                                                                                                                                                                                                                                                                                                                                                                                                                                                                                                                                                                                                                                                                                                                                                                                                                                                                                                                                                                                                                                                                                                                                                                                                                                                                                                                                                                                                                                                                                                                                                                                                                                                                                                                                                                                                                                                                                                                                                                                                                                                                                                                                                                                                                                                                                                                                                                                                           |
| Heart                            | I51.3, I31.8, I31.3, I30.                                                                                                                                                                                                                                                                                                                                                                                                                                                                                                                                                                                                                                                                                                                                                                                                                                                                                                                                                                                                                                                                                                                                                                                                                                                                                                                                                                                                                                                                                                                                                                                                                                                                                                                                                                                                                                                                                                                                                                                                                                                                                                                                                                                                                                                                                                                                                                                                                                                                                                                                                                                                                                                                                                                                                                                                                                                                                                                                                                                                                                                                                                           |
| Musculoskeletal                  | S22.3, S22.31, S22.31XA, S22.31XB, S22.31XD, S22.31XG, S22.31XK, S22.31XS, S22.32, S22.32XA, S22.32XB, S22.32XD, S22.32XG, S22.32XK, S22.32XS, S22.39, S22.39XA, S22.39XB, S22.39XD, S22.39XG, S22.39XK, S22.39XS, S22.4, S22.41, S22.41XA, S22.41XB, S22.41XD, S22.41XG, S22.41XK, S22.41XS, S22.42, S22.42XA, S22.42XB, S22.42XD, S22.42XG, S22.42XK, S22.42XS, S22.43, S22.43XA, S22.43XB, S22.43XD, S22.43XG, S22.43XK, S22.43XS, S22.49, S22.49XA, S22.49XB, S22.49XD, S22.49XG, S22.49XK, S22.49XS, S42.0, S42.00, S42.001, S42.001A, S42.001B, S42.001D, S42.001G, S42.001K, S42.001P, S42.001S, S42.002, S42.002A, S42.002B, S42.002D, S42.002G, S42.002K, S42.002P, S42.002S, S42.009, S42.009A, S42.009B, S42.009D, S42.009G, S42.009K, S42.009P, S42.009S, S42.01, S42.011, S42.011A, S42.011B, S42.011D, S42.011G, S42.011K, S42.011P, S42.011S, S42.012, S42.012A, S42.012B, S42.012D, S42.012G, S42.012K, S42.012P, S42.012S, S42.013, S42.013A, S42.013B, S42.013D, S42.013G, S42.013K, S42.013P, S42.013S, S42.014, S42.014A, S42.014B, S42.014D, S42.014G, S42.014K, S42.014P, S42.014S, S42.015, S42.015A, S42.015B, S42.015D, S42.015G, S42.015K, S42.015P, S42.015S, S42.016, S42.016A, S42.016B, S42.016D, S42.016G, S42.016K, S42.016P, S42.016S, S42.017, S42.017A, S42.017B, S42.017D, S42.017G, S42.017K, S42.017P, S42.017S, S42.018, S42.018A, S42.018B, S42.018D, S42.018G, S42.018K, S42.018P, S42.018S, S42.019, S42.019A, S42.019B, S42.019D, S42.019G, S42.019K, S42.019P, S42.019S, S42.02, S42.021, S42.021A, S42.021B, S42.021D, S42.021G, S42.021K, S42.021P, S42.021S, S42.022, S42.022A, S42.022B, S42.022D, S42.022G, S42.022K, S42.022P, S42.022S, S42.023, S42.023A, S42.023B, S42.023D, S42.023G, S42.023K, S42.023P, S42.023S, S42.024, S42.024A, S42.024B, S42.024D, S42.024G, S42.024K, S42.024P, S42.024S, S42.025, S42.025A, S42.025B, S42.025D, S42.025G, S42.025K, S42.025P, S42.025S, S42.026, S42.026A, S42.026B, S42.026D, S42.026G, S42.026K, S42.026P, S42.026S, S42.03, S42.031, S42.031A, S42.031B, S42.031D, S42.031G, S42.031K, S42.031P, S42.031S, S42.032, S42.032A, S42.032B, S42.032D, S42.032G, S42.032K, S42.032P, S42.032S, S42.033, S42.033A, S42.033B, S42.033D, S42.033G, S42.033K, S42.033P, S42.033S, S42.034, S42.034A, S42.034B, S42.034D, S42.034G, S42.034K, S42.034P, S42.034S, S42.035, S42.035A, S42.035B, S42.035D, S42.035G, S42.035K, S42.035P, S42.035S, S42.036, S42.036A, S42.036B, S42.036D, S42.036G, S42.036K, S42.036P, S42.036S, S42.9, S42.90, S42.90XA, S42.90XB, S42.90XD, S42.90XG, S42.90XK, S42.90XP, S42.90XS, S42.91, S42.91XA, S42.91XB, S42.91XD, S42.91XG, S42.91XK, S42.91XP, S42.91XS, S42.92, S42.92XA, S42.92XB, S42.92XD, S42.92XG, S42.92XK, S42.92XP, S42.92XS, C41.3, C41.2, C41.9, C79.5, C79.51, C79.52, M62.18, M62.11, M62.111, M62.112, M62.119, M62.10, D18.09, M89.9, M51, M51.0, M51.04, M51.05, M51.06, M51.1, M51.14, M51.15, M51.16, M51.17, M51.2, M51.24, M51.25, M51.26, M51.27, M51.3, M51.34, M51.35, M51.36, M51.37, M51.4, M51.44, M51.45, M51.46, M51.47, M51.8, M51.84, M51.85, M51.86, M51.87, M51. |
| Mediastinal/axillary lymph nodes | R59, R59.0, R59.1, R59.9, C77.3, D36.0                                                                                                                                                                                                                                                                                                                                                                                                                                                                                                                                                                                                                                                                                                                                                                                                                                                                                                                                                                                                                                                                                                                                                                                                                                                                                                                                                                                                                                                                                                                                                                                                                                                                                                                                                                                                                                                                                                                                                                                                                                                                                                                                                                                                                                                                                                                                                                                                                                                                                                                                                                                                                                                                                                                                                                                                                                                                                                                                                                                                                                                                                              |
| Vascular                         | D18.0, D18.00, D18.01, D18.02, Q26, Q26.0, Q26.1, Q26.2, Q26.3, Q26.4, Q26.5, Q26.6, Q26.8, Q26.9                                                                                                                                                                                                                                                                                                                                                                                                                                                                                                                                                                                                                                                                                                                                                                                                                                                                                                                                                                                                                                                                                                                                                                                                                                                                                                                                                                                                                                                                                                                                                                                                                                                                                                                                                                                                                                                                                                                                                                                                                                                                                                                                                                                                                                                                                                                                                                                                                                                                                                                                                                                                                                                                                                                                                                                                                                                                                                                                                                                                                                   |
| Thyroid                          | C73, E04, E04.0, E04.1, E04.2, E04.8, E04.9, E07.1, E06.0, E06.1, E06.2, E06.3, E06.4, E06.9, E07.0, E07.8, E07.81, E07.89, E07.9, D34, E05.0, E05.00, E05.01, E05.1, E05.10, E05.11, E05.2, E05.20, E05.21, E05.3, E05.30, E05.31, E05.4, E05.40, E05.41, E05.8, E05.80, E05.81, E05.9, E05.90, E05.91, E03, E03.0, E03.1, E03.2, E03.3, E03.4, E03.5, E03.8, E03.9, E01.8, E02, E89.0                                                                                                                                                                                                                                                                                                                                                                                                                                                                                                                                                                                                                                                                                                                                                                                                                                                                                                                                                                                                                                                                                                                                                                                                                                                                                                                                                                                                                                                                                                                                                                                                                                                                                                                                                                                                                                                                                                                                                                                                                                                                                                                                                                                                                                                                                                                                                                                                                                                                                                                                                                                                                                                                                                                                             |

| Organ/category                                                          | ICD-10 codes                                                                                                                                                                                                                                                                                                                                                                                                                                                                                                                                                                                                                                                                                                                                                                                                                                                                                                                                                                                                                                                                                                                                                                                                                                                                                                                                                                                                                                                                                                                                                                                                                                                                                                                                                                                                                                                                                                                                |
|-------------------------------------------------------------------------|---------------------------------------------------------------------------------------------------------------------------------------------------------------------------------------------------------------------------------------------------------------------------------------------------------------------------------------------------------------------------------------------------------------------------------------------------------------------------------------------------------------------------------------------------------------------------------------------------------------------------------------------------------------------------------------------------------------------------------------------------------------------------------------------------------------------------------------------------------------------------------------------------------------------------------------------------------------------------------------------------------------------------------------------------------------------------------------------------------------------------------------------------------------------------------------------------------------------------------------------------------------------------------------------------------------------------------------------------------------------------------------------------------------------------------------------------------------------------------------------------------------------------------------------------------------------------------------------------------------------------------------------------------------------------------------------------------------------------------------------------------------------------------------------------------------------------------------------------------------------------------------------------------------------------------------------|
| Spleen                                                                  | D73, D73.0, D73.1, D73.2, D73.3, D73.4, D73.5, D73.8, D73.81, D73.89, D73.9, C26.1, R16.1, R16.2, Q89.0, Q89.01, Q89.0                                                                                                                                                                                                                                                                                                                                                                                                                                                                                                                                                                                                                                                                                                                                                                                                                                                                                                                                                                                                                                                                                                                                                                                                                                                                                                                                                                                                                                                                                                                                                                                                                                                                                                                                                                                                                      |
| Kidney                                                                  | C64.1, C64.2, C64.9, C68.9, D30.00, D30.01, D30.02, D41.00, D41.01, D41.02, D41.10, D41.11, D41.12, D41.20, D41.21, D41.22, D59.3, E08.21, E08.22, E08.29, E08.65, E09.21, E09.22, E09.29, E10.21, E10.22, E10.29, E10.65, E11.21, E11.22, E11.29, E11.65, E13.21, E13.22, E13.29, E74.8, I12.0, I12.9, I13.0, I13.10, I13.11, I13.2, I70.1, I72.2, K76.7, M10.30, M10.311, M10.312, M10.319, M10.321, M10.322, M10.329, M10.331, M10.332, M10.339, M10.341, M10.342, M10.349, M10.351, M10.352, M10.359, M10.361, M10.362, M10.369, M10.371, M10.372, M10.379, M10.38, M10.39, M32.14, M32.15, M35.04, N00.0, N00.1, N00.2, N00.3, N00.4, N00.5, N00.6, N00.7, N00.8, N00.9, N01.0, N01.1, N01.2, N01.3, N01.4, N01.5, N01.6, N01.7, N01.8, N01.9, N02.0, N02.1, N02.2, N02.3, N02.4, N02.5, N02.6, N02.7, N02.8, N02.9, N03.0, N03.1, N03.2, N03.3, N03.4, N03.5, N03.6, N03.7, N03.8, N03.9, N04.0, N04.1, N04.2, N04.3, N04.4, N04.5, N04.6, N04.7, N04.8, N04.9, N05.0, N05.1, N05.2, N05.3, N05.4, N05.5, N05.6, N05.7, N05.8, N05.9, N06.0, N06.1, N06.2, N06.3, N06.4, N06.5, N06.6, N06.7, N06.8, N06.9, N07.0, N07.1, N07.2, N07.3, N07.4, N07.5, N07.6, N07.7, N07.8, N07.9, N08, N13.1, N13.2, N13.30, N13.39, N14.0, N14.1, N14.2, N14.3, N14.4, N15.0, N15.8, N15.9, N16, N17.0, N17.1, N17.2, N17.8, N17.9, N18.1, N18.2, N18.3, N18.4, N18.5, N18.6, N18.9, N19, N25.0, N25.1, N25.81, N25.89, N25.9, N26.1, N26.9, Q61.11, Q61.4, Q62.0, Q62.2, Q62.31, Q62.32, R94.4, C79.0, C79.00, C79.01, C79.02, C79.1, C79.10, C79.11, C79.19, N28.1, Q61.00, Q61.9, Q61.3, Q61.2, Q61.19, Q61.5, Q61.02, Q61.8, N20, N20.0, N20.1, N20.2, N20.9, Q61.4, Q62.11, Q62.10, Q62.39, Q62.12, N30, N30.0, N30.00, N30.01, N30.1, N30.10, N30.11, N30.2, N30.20, N30.21, N30.3, N30.30, N30.31, N30.4, N30.40, N30.41, N30.8, N30.80, N30.81, N30.9, N30.90, N30.91, N34, N34.0, N34.1, N34.2, N34.3, N73.9, N12, C65, C65.1, C65.2, C65.9 |
| Adrenal                                                                 | D35.0, D35.00, D35.01, D35.02, C74, C74.0, C74.00, C74.01, C74.02, C74.1, C74.10, C74.11, C74.12, C74.9, C74.90, C74.91, C74.92, C79.7, C79.70, C79.71, C79.72, E27, E27.0, E27.2, E27.3, E27.4, E27.40, E27.49, E27.5, E27.8, E27.9, Q89.1, S37.81, S37.812, S37.812A, S37.812D, S37.812S, S37.813, S37.813A, S37.813D, S37.813S, S37.818, S37.818A, S37.818D, S37.818S, S37.819, S37.819A, S37.819D, S37.819S, D44.1, D44.10, D44.11, D44.12                                                                                                                                                                                                                                                                                                                                                                                                                                                                                                                                                                                                                                                                                                                                                                                                                                                                                                                                                                                                                                                                                                                                                                                                                                                                                                                                                                                                                                                                                              |
| GI not otherwise specified                                              | C18, C18.0, C18.1, C18.2, C18.3, C18.4, C18.5, C18.6, C18.7, C18.8, C18.9, C19, C20, D01, D01.0, D01.1, D01.2, D01.3, D01.4, D01.40, D01.49, D01.9, R85, R85.0, R85.1, R85.2, R85.3, R85.4, R85.5, R85.6, R85.61, R85.610, R85.611, R85.612, R85.613, R85.614, R85.615, R85.616, R85.618, R85.619, R85.69, R85.7, R85.8, R85.81, R85.82, R85.89, R85.9, D13, D13.0, D13.1, D13.2, D13.3, D13.30, D13.39, D13.9, K31.9, C49.A, C49.A0, C49.A1, C49.A2, C49.A3, C49.A4, C49.A5, C49.A9, K44, K44.0, K44.1, K44.9, K40, K40.0, K40.00, K40.01, K40.1, K40.10, K40.11, K40.2, K40.20, K40.21, K40.3, K40.30, K40.31, K40.4, K40.40, K40.41, K40.9, K40.90, K40.91                                                                                                                                                                                                                                                                                                                                                                                                                                                                                                                                                                                                                                                                                                                                                                                                                                                                                                                                                                                                                                                                                                                                                                                                                                                                               |
| Intraperitoneal                                                         | R18, R18.0, R18.8                                                                                                                                                                                                                                                                                                                                                                                                                                                                                                                                                                                                                                                                                                                                                                                                                                                                                                                                                                                                                                                                                                                                                                                                                                                                                                                                                                                                                                                                                                                                                                                                                                                                                                                                                                                                                                                                                                                           |
| Infectious (syphilis, tuberculosis, malaria)                            | A52.75, A15, A15.0, A15.4, A15.5, A15.6, A15.7, A15.8, A15.9, A17, A17.0, A17.1, A17.8, A17.81, A17.82, A17.83, A17.89, A17.9, A18, A18.0, A18.01, A18.02, A18.03, A18.09, A18.1, A18.10, A18.11, A18.12, A18.13, A18.14, A18.15, A18.16, A18.17, A18.18, A18.2, A18.3, A18.31, A18.32, A18.39, A18.4, A18.5, A18.50, A18.51, A18.52, A18.53, A18.54, A18.59, A18.6, A18.7, A18.8, A18.81, A18.82, A18.83, A18.84, A18.85, A18.89, A19, A19.1, A19.2, A19.3, A19.8, A19.9, Z22.7, B90, B90.0, B90.1, B90.2, B90.8, B90.9, J6, B52.0                                                                                                                                                                                                                                                                                                                                                                                                                                                                                                                                                                                                                                                                                                                                                                                                                                                                                                                                                                                                                                                                                                                                                                                                                                                                                                                                                                                                         |
| Inflammatory (sarcoidosis, amyloidosis, pseudosarcomatous fibromatosis) | D86.0, D86.1, D86.2, D86.3, D86.8, D86.81, D86.82, D86.83, D86.84, D86.85, D86.86, D86.87, D86.89, D86.9, E85, E85.0, E85.1, E85.2, E85.3, E85.4, E85.8, E85.81, E85.82, E85.89, E85.9, M72.4                                                                                                                                                                                                                                                                                                                                                                                                                                                                                                                                                                                                                                                                                                                                                                                                                                                                                                                                                                                                                                                                                                                                                                                                                                                                                                                                                                                                                                                                                                                                                                                                                                                                                                                                               |
| Other malignancies                                                      | C40, C40.0, C40.00, C40.01, C40.02, C40.1, C40.10, C40.11, C40.12, C40.2, C40.20, C40.21, C40.22, C40.3, C40.30, C40.31, C40.32, C40.8, C40.80, C40.81, C40.82, C40.9, C40.90, C40.91, C40.92, C48, C48.0, C48.1, C48.2, C48.8, C54, C54.0, C54.1, C54.2, C54.3, C54.8, C54.9, C55, C56, C56.1, C56.2, C56.9, C79.6, C79.60, C79.61, C79.62, C79.82                                                                                                                                                                                                                                                                                                                                                                                                                                                                                                                                                                                                                                                                                                                                                                                                                                                                                                                                                                                                                                                                                                                                                                                                                                                                                                                                                                                                                                                                                                                                                                                         |

<sup>a</sup>Diagnoses include only specific diagnoses within an organ or other category that could be detected on breast MRI

**eTable 8.** Cascade Event Rates and Total and Out-of-Pocket Spending on Mammary Cascade Services among Screening Breast MRI vs Mammography Recipients in the 6 Months Following the Screening Test, Sensitivity Analysis including Mammograms as Cascade Events

|                                                    | Event rate per 100 members     |                               | Breast MRI cascade-attributable event rate per 100 members, 95% CI |
|----------------------------------------------------|--------------------------------|-------------------------------|--------------------------------------------------------------------|
|                                                    | Breast MRI cohort<br>N = 9,208 | Mammogram cohort<br>N = 9,208 |                                                                    |
| All mammary cascade events                         | 164.4                          | 106.8                         | 57.7 (51.9, 63.4)                                                  |
| Mammary imaging tests                              | 48.5                           | 24.8                          | 23.7 (21.6, 25.9)                                                  |
|                                                    |                                |                               |                                                                    |
|                                                    | Spending per member            |                               | Breast MRI cascade-attributable spending per member, 95% CI        |
|                                                    | Breast MRI cohort<br>N = 9,208 | Mammogram cohort<br>N = 9,208 |                                                                    |
| Total spending on mammary cascade services         | \$962                          | \$337                         | \$625 (591, 659)                                                   |
| Out-of-pocket spending on mammary cascade services | \$102                          | \$62                          | \$40 (36, 45)                                                      |



**eTable 9.** Total and Out-of-Pocket Spending on Mammary Cascade Services, Extra-Mammary Cascade Services, and All Services Among Screening Breast MRI vs Mammography Recipients in the 6 Months Following the Screening Test, Including Spending on the Index Event

|                                       |                        | Spending per member            |                               | Breast MRI cascade-attributable spending per member, 95% CI |
|---------------------------------------|------------------------|--------------------------------|-------------------------------|-------------------------------------------------------------|
|                                       |                        | Breast MRI cohort<br>N = 9,208 | Mammogram cohort<br>N = 9,208 |                                                             |
| <b>Mammary cascade services</b>       | Total spending         | \$2,281                        | \$575                         | \$1,707 (1,674, 1,739)                                      |
|                                       | Out-of-pocket spending | \$360                          | \$55                          | \$305 (297, 313)                                            |
| <b>Extra-mammary cascade services</b> | Total spending         | \$2,116                        | \$931                         | \$1,185 (1,153, 1,216)                                      |
|                                       | Out-of-pocket spending | \$397                          | \$144                         | \$254 (244, 263)                                            |
| <b>All services</b>                   | Total spending         | \$7,227                        | \$4,681                       | \$2,546 (2,339, 2,753)                                      |
|                                       | Out-of-pocket spending | \$837                          | \$544                         | \$293 (265, 320)                                            |
